# Supplementary material
Source: MDPI journal article supplement (https://www.mdpi.com/2072-4292/15/2/345)
Supplement: s1 [file s1]

## Supplementary materials

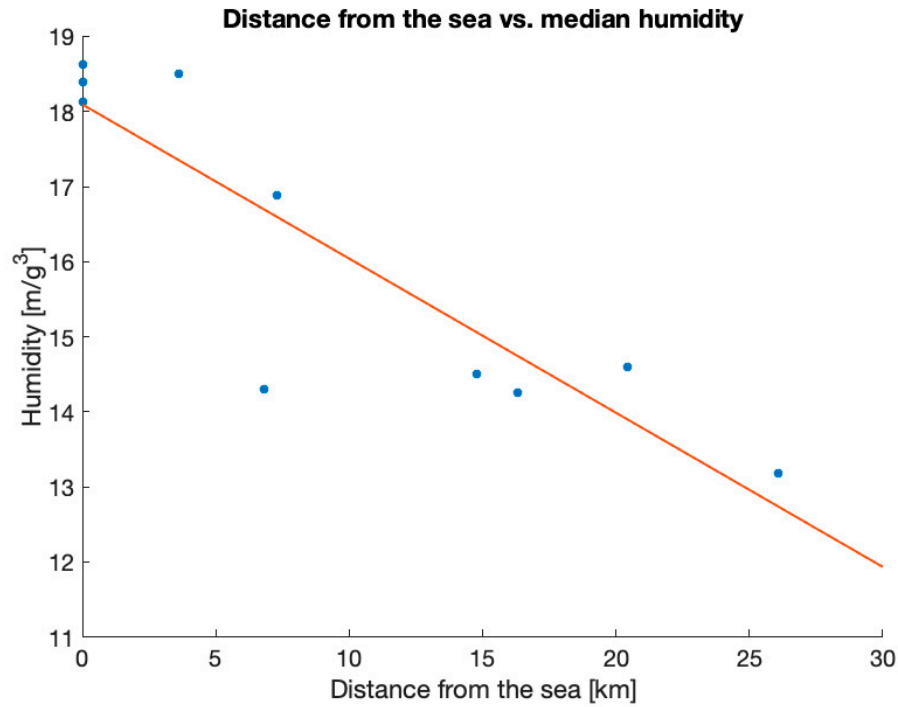

**Figure S1:** The median humidity from several weather stations along the Israeli coastline as a function of the distance from the sea.

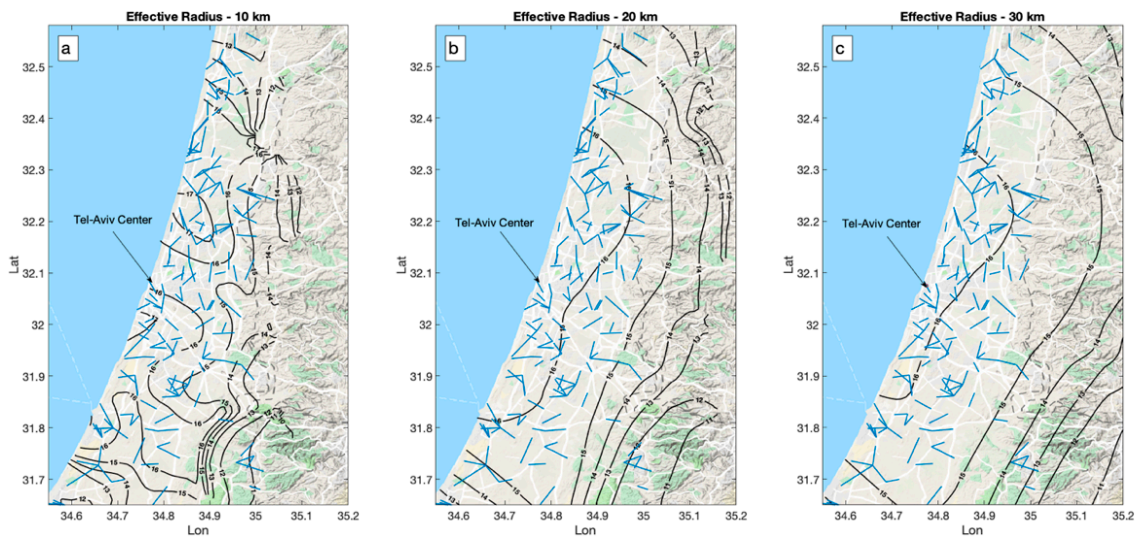

**Figure S2:** The average humidity field for the July 2017 (one instantaneous measurement every night at 3 am), for 10 km (a), 20 km (b), and 30 km (c) radius of interpolation.

**Table S1:** Four Skills Comparison for the Three Data Sources for July 2017.

| Name              | <i>CORR Links-IMS</i> | <i>CORR ECMWF-IMS</i> | <i>RMSD Links-IMS</i> | <i>RMSD ECMWF-IMS</i> | <i>Mean ECMWF</i> | <i>Mean IMS</i> | <i>Mean CMLs</i> | <i>STD ECMWF</i> | <i>STD IMS</i> | <i>STD Links</i> |
|-------------------|-----------------------|-----------------------|-----------------------|-----------------------|-------------------|-----------------|------------------|------------------|----------------|------------------|
| ASHDOD PORT       | <u>0.65</u>           | 0.11                  | 3.31                  | <u>2.87</u>           | <u>19.53</u>      | 20.76           | 17.82            | 2.14             | 1.81           | <u>1.84</u>      |
| BET DAGAN         | <u>0.83</u>           | 0.57                  | <u>1.54</u>           | 1.95                  | <u>19.76</u>      | 18.62           | 17.36            | <u>1.88</u>      | 1.56           | 1.19             |
| HADERA PORT       | <u>0.8</u>            | 0.74                  | 3.7                   | <u>1.26</u>           | <u>20.85</u>      | 20.65           | 17.08            | <u>1.82</u>      | 1.7            | 1.41             |
| HAFEZ HAYYIM      | 0.49                  | <u>0.72</u>           | <u>1.83</u>           | 2.97                  | 19.53             | 17              | <u>16.98</u>     | <u>2.14</u>      | 2.06           | 1.44             |
| ENHAHORESH        | <u>0.74</u>           | 0.67                  | <u>1.48</u>           | 3.73                  | 20.85             | 17.39           | <u>18.38</u>     | <u>1.82</u>      | 1.65           | 1.44             |
| NAHSHON           | 0.5                   | <u>0.89</u>           | 4.03                  | <u>2.56</u>           | 17.04             | 14.96           | <u>16.63</u>     | <u>2.86</u>      | 3.38           | 4                |
| TEL AVIV COAST    | <u>0.91</u>           | 0.26                  | 2.55                  | <u>2.23</u>           | <u>19.76</u>      | 20.02           | 17.59            | <u>1.88</u>      | 1.82           | 1.62             |
| <sup>a</sup> MEAN | <u>0.7</u>            | 0.57                  | 2.63                  | <u>2.51</u>           | 19.62             | 18.49           | <u>17.41</u>     | <u>2.07</u>      | 2              | 1.85             |

Note. First column: Station name; second and third (in parentheses) columns: Correlations (CORR) between the humidity from the 388 links (and ECMWF reanalysis, ERA-5) and the 7 IMS stations' humidity; fourth and fifth columns: as for second and third but for RMSD (g/m<sup>3</sup>); Next three columns (sixth, seventh, and eighth) show the MEAN humidity (g/m<sup>3</sup>) for links, ECMWF and stations; last three columns are as for the MEAN but for the standard deviation humidity, STD (g/m<sup>3</sup>) for the links, ECMWF reanalysis, and 7 IMS stations at the stations' locations. Values in bold indicate the best result. ECMWF = European Centre for Medium-Range Weather Forecasts; IMS = Israeli Meteorological Service; RMSD = root-mean-square deviation; STD = standard deviation. <sup>a</sup> The MEANs for all the 7 IMS stations (rows) for all the skills and all the links (388 links).
